# Supplementary material for: Quality Evaluation of Pseudostellariae Radix Based on Simultaneous Determination of Multiple Bioactive Components Combined with Grey Relational Analysis
Source: Molecules. 2016 Dec 26;22(1):13. doi: 10.3390/molecules22010013 (PMC6155879; doi:10.3390/molecules22010013)
Supplement: Supplementary file 1 [file molecules-22-00013-s001.xlsx]

## Sheet: Sheet1
Raw data
Different harvesting times
Sample	1	2	3	4	5	6	7	8	9	10	11	12	13	14	15	16	17	18	19	20	21	22	23	24	25	26	27	28	29	30
X0	117.407	2468.06	281.333	300.667	156.547	250	108.4	107.667	513.333	211.2	224	6.00919	216.667	46.4667	1422.67	250.173	66.0667	15.3533	213.333	50.4	21.92	41.8	193.897	262	44.3333	259.333	34.2667	366.667	26.4667	388
X1 (S26)	104.087	1028.67	118.4	157.667	118.933	107.333	89.9333	89.4	223.333	115.067	123.2	3.76	75.1333	33.8	1352.67	82.366	66.0667	10.74	213.333	49.6	3.02	37.4	64.2667	262	31.2	141.867	34.2667	228	19.2	274
X2 (S27)	77.34	910.667	107.8	148.6	139.533	141.133	80.8667	80.4	240.667	116.4	126.8	0.606667	108	46.4667	1230.67	55.1287	17.5733	6.76	20.9467	13.2933	7.39333	15.54	68.2667	160.733	15.7133	162.467	10.7133	199.467	20.1	296
X3 (S28)	39.2333	824	129.533	109	84.1333	124.267	39	38.8	210.533	94.2667	98.8	1.00067	85.9333	27.0667	1288	27.4933	9.16	9.12667	10.64	11.2133	6.96667	14.2333	57.184	98.4667	14.1333	108	6.55333	136.867	13.4333	234
X4 (S29)	117.407	2468.06	281.333	9.28667	156.547	250	108.4	107.667	513.333	211.2	224	6.00919	216.667	33.5333	1205.33	250.173	11.9667	15.3533	26	50.4	21.92	41.8	193.897	234	44.3333	259.333	19.0133	366.667	26.4667	388
X5 (S30)	64.98	1296.67	131	300.667	74.7333	134.6	53.1333	52.7333	276	98.4	104.4	4.78667	124.133	41.7333	1422.67	67.5333	2.18	9.24667	17.36	16.6133	7.5	15.08	68.2	104.067	12.5267	108.133	6.38	139.733	12.2067	220
Average	80.6093	1305.61	153.613	145.044	114.776	151.467	74.2667	73.8	292.773	127.067	135.44	3.23264	121.973	36.52	1299.87	96.5389	21.3893	10.2453	57.656	28.224	9.36	24.8107	90.3629	171.853	23.5813	155.96	15.3853	214.147	18.2813	282.4
Different habitats
Sample	1	2	3	4	5	6	7	8	9	10	11	12	13	14	15	16	17	18	19	20	21	22	23	24	25	26	27	28	29	30
X0	114.333	1872.67	211.133	443.333	114.067	206.667	83.7333	83.2667	395.333	154.067	169.2	8.68667	295.333	55.6667	1304	119.565	42.4	15.0933	38.2	33.4	15.4767	30.3333	200.733	218.667	26.6667	241.333	17.7667	349.333	104.067	309.333
X1 (S102)	114.333	1872.67	211.133	443.333	114.067	206.667	83.7333	83.2667	395.333	154.067	169.2	8.68667	177.8	55.6667	1140.67	119.565	12.98	15.0933	31.9333	33.4	15.4767	30.3333	134.385	174.867	26.6667	163.6	10.6667	252.667	19.0667	309.333
X2 (S103)	76.4667	978	139.667	136.533	78.2	98.6	65.9333	65.5333	173.733	62.6667	67.6	2.33333	83.8	39.5333	1172	77.4487	8.46	6.98667	13.7867	17.2467	7.60667	20.1533	130.133	162.933	18.1067	182.467	12.42	253.333	104.067	11.5467
X3 (S104)	67.9933	1250.67	143.533	195.133	85.0667	127	65.7333	65.3333	250.667	104.8	112.6	5.41333	295.333	35	1196	101.787	11.44	13.6	38.2	30.4667	9.30867	23.4667	200.733	218.667	23.1333	241.333	17.7667	349.333	59.2	4.98
X4 (S105)	42.8733	1130	87.9333	114.333	75	132.333	53.2	52.8667	160.6	82.5333	86.0667	0.368	189.333	43.8667	1179.33	39.0667	20.12	3.38667	15.5933	3.09333	1.56067	6.14	60.6	155.933	3.34	146.4	9.54667	130.8	26.6	217.333
X5 (S106)	100.42	1077.33	106.933	240.667	101	126.467	56.3333	56	202	108.2	121.8	1.32067	45.7333	27.5333	1304	61.2533	42.4	10.3067	24.8667	22.1333	7.85333	20.8	112.4	155.067	15.94	157.533	10.2933	193.867	56	102.667
Average	80.4173	1261.73	137.84	226	90.6667	138.213	64.9867	64.6	236.467	102.453	111.453	3.6244	158.4	40.32	1198.4	79.8241	19.08	9.87467	24.876	21.268	8.3612	20.1787	127.65	173.493	17.4373	178.267	12.1387	236	52.9867	129.172
Different processing methods
Sample	1	2	3	4	5	6	7	8	9	10	11	12	13	14	15	16	17	18	19	20	21	22	23	24	25	26	27	28	29	30
X0	56.2	696	52.6	218	75.8	169.2	31.8	31.5333	90.8	54.8	59.3333	0.494	130.667	57	1366	82.4	8.7	10.9	32.9333	17.2333	8.62	19.6667	156.333	193.067	16.1	176.2	11.7133	282	24.6667	247.333
X1 (S107)	36	568	52.6	106.867	71	122.667	27.6667	27.4667	90.8	54.8	59.3333	0.2678	107	32.5333	1257.33	45.6	3.42	10.9	22.8667	10.9467	7.46667	16.2533	148.267	176.867	12.8467	168.333	11.3133	282	20.8667	198.733
X2 (S108)	41.2667	531.333	40.5333	80.7333	75.8	125.133	31.2667	31.0667	80.3333	50	54.4	0.494	103	38.2667	1285.33	82.4	3.74	4.9	14.7533	11.5867	8.62	19.6667	128.067	167.2	16.1	171.533	11.5	247.333	18.48	174.067
X3 (S109)	33.7333	237.333	6.1	21.6667	41.6667	111.867	9.48	9.39333	39.6667	29.9333	33.3333	0.2891	100.533	22.9333	1366	60.8667	2.78	3.92	16.2733	15.6867	7.98667	19.6267	123.6	163	16.0133	159.867	10.6467	236	18.38	178
X4 (S110)	45.5333	696	27.3333	106.467	70.2667	146.6	24.0667	23.8667	79.4	53.2667	59.0667	0.2989	130.667	33.3333	1357.33	68.6	8.7	6.62667	13.0867	16.6133	7.18	16.64	139.2	176.2	14.6667	166.2	10.9667	251.333	22.4	220
X5 (S111)	56.2	634	21.2	218	74.8	169.2	31.8	31.5333	58.1333	50.3333	54.8	0.231667	110.267	57	1319.33	73.5333	2.579	7.02667	32.9333	17.2333	6.76667	14.84	156.333	193.067	13.5733	176.2	11.7133	282	24.6667	247.333
Average	42.5467	533.333	29.5533	106.747	66.7067	135.093	24.856	24.6653	69.6667	47.6667	52.1867	0.316293	110.293	36.8133	1317.07	66.2	4.2438	6.67467	19.9827	14.4133	7.604	17.4053	139.093	175.267	14.64	168.427	11.228	259.733	20.9587	203.627
Normalization treatment of raw data
Different harvesting times
Sample	1	2	3	4	5	6	7	8	9	10	11	12	13	14	15	16	17	18	19	20	21	22	23	24	25	26	27	28	29	30
X0	1.45649	1.89035	1.83144	2.07293	1.36393	1.65053	1.45961	1.4589	1.75335	1.66212	1.65387	1.85891	1.77634	1.27236	1.09447	2.59142	3.08877	1.49857	3.70011	1.78571	2.34188	1.68476	2.14576	1.52456	1.88002	1.66282	2.22723	1.71222	1.44774	1.37394
X1 (S26)	1.29125	0.787881	0.770766	1.08703	1.03622	0.708627	1.21095	1.21138	0.76282	0.905561	0.909628	1.16314	0.615982	0.92552	1.04062	0.853189	3.08877	1.04828	3.70011	1.75737	0.32265	1.50742	0.711206	1.52456	1.32308	0.909635	2.22723	1.06469	1.05025	0.970255
X2 (S27)	0.959442	0.697502	0.701762	1.02452	1.2157	0.931778	1.08887	1.08943	0.822024	0.916055	0.936208	0.187669	0.885439	1.27236	0.946764	0.571051	0.821593	0.659813	0.363304	0.470994	0.789886	0.626344	0.755472	0.935294	0.666346	1.04172	0.696334	0.931449	1.09948	1.04816
X3 (S28)	0.48671	0.631122	0.843243	0.751496	0.733022	0.820423	0.525135	0.525745	0.7191	0.741868	0.729474	0.309551	0.704526	0.741146	0.990871	0.28479	0.428251	0.890812	0.184543	0.397298	0.744302	0.573678	0.632826	0.572969	0.599344	0.692485	0.425947	0.639126	0.734811	0.828612
X4 (S29)	1.45649	1.89035	1.83144	0.0640265	1.36393	1.65053	1.45961	1.4589	1.75335	1.66212	1.65387	1.85891	1.77634	0.918218	0.927275	2.59142	0.559469	1.49857	0.45095	1.78571	2.34188	1.68476	2.14576	1.36163	1.88002	1.66282	1.23581	1.71222	1.44774	1.37394
X5 (S30)	0.80611	0.993149	0.852791	2.07293	0.651123	0.888644	0.71544	0.714544	0.942709	0.774397	0.770821	1.48073	1.01771	1.14275	1.09447	0.699545	0.10192	0.902525	0.301096	0.588624	0.801282	0.607803	0.754734	0.605555	0.531211	0.69334	0.414681	0.652512	0.667712	0.779037
Different habitats
Sample	1	2	3	4	5	6	7	8	9	10	11	12	13	14	15	16	17	18	19	20	21	22	23	24	25	26	27	28	29	30
X0	1.42175	1.4842	1.53173	1.96165	1.25809	1.49527	1.28847	1.28896	1.67184	1.50377	1.51812	2.39672	1.86448	1.38062	1.08812	1.49785	2.22222	1.52849	1.53562	1.57043	1.85101	1.50324	1.57252	1.26038	1.52929	1.35378	1.46364	1.48023	1.96402	2.39474
X1 (S102)	1.42175	1.4842	1.53173	1.96165	1.25809	1.49527	1.28847	1.28896	1.67184	1.50377	1.51812	2.39672	1.12247	1.38062	0.951825	1.49785	0.680294	1.52849	1.2837	1.57043	1.85101	1.50324	1.05276	1.00792	1.52929	0.917726	0.878735	1.07062	0.359839	2.39474
X2 (S103)	0.950873	0.775124	1.01325	0.60413	0.8625	0.71339	1.01457	1.01445	0.734705	0.611661	0.606532	0.643785	0.52904	0.980489	0.977971	0.970241	0.443396	0.707534	0.554216	0.810921	0.909758	0.998745	1.01945	0.939133	1.03839	1.02356	1.02318	1.07345	1.96402	0.0893899
X3 (S104)	0.845506	0.991229	1.0413	0.863422	0.938235	0.918869	1.01149	1.01135	1.06005	1.0229	1.01029	1.49358	1.86448	0.868056	0.997997	1.27514	0.599581	1.37726	1.53562	1.43251	1.11332	1.16294	1.57252	1.26038	1.32666	1.35378	1.46364	1.48023	1.11726	0.0385532
X4 (S105)	0.533135	0.895593	0.637938	0.5059	0.827206	0.957457	0.818629	0.818369	0.679165	0.80557	0.772222	0.101534	1.19529	1.08796	0.98409	0.489409	1.05451	0.342965	0.626842	0.145445	0.186656	0.304282	0.474734	0.898786	0.191543	0.821242	0.786467	0.554237	0.502013	1.68251
X5 (S106)	1.24874	0.853852	0.775779	1.0649	1.11397	0.915011	0.866844	0.866873	0.854243	1.05609	1.09283	0.364382	0.288721	0.68287	1.08812	0.767354	2.22222	1.04375	0.999625	1.04069	0.939259	1.03079	0.88053	0.89379	0.914131	0.883695	0.847979	0.821469	1.05687	0.794806
Different processing methods
Sample	1	2	3	4	5	6	7	8	9	10	11	12	13	14	15	16	17	18	19	20	21	22	23	24	25	26	27	28	29	30
X0	1.3209	1.305	1.77983	2.04222	1.13632	1.25247	1.27937	1.27845	1.30335	1.14965	1.13694	1.56184	1.18472	1.54835	1.03715	1.24471	2.05005	1.63304	1.6481	1.19565	1.13361	1.12992	1.12395	1.10156	1.09973	1.04615	1.04323	1.08573	1.17692	1.21464
X1 (S107)	0.84613	1.065	1.77983	1.00112	1.06436	0.908014	1.11308	1.11357	1.30335	1.14965	1.13694	0.846682	0.97014	0.883738	0.954647	0.688822	0.805882	1.63304	1.14433	0.759482	0.981939	0.933813	1.06595	1.00913	0.877505	0.999446	1.0076	1.08573	0.99561	0.975969
X2 (S108)	0.969915	0.99625	1.37153	0.756308	1.13632	0.926273	1.25791	1.25953	1.15311	1.04895	1.04241	1.56184	0.933873	1.03948	0.975906	1.24471	0.881286	0.734119	0.738307	0.803885	1.13361	1.12992	0.920725	0.953975	1.09973	1.01845	1.02423	0.952259	0.881735	0.854832
X3 (S109)	0.792855	0.445	0.206406	0.202973	0.624625	0.828069	0.381397	0.380831	0.569378	0.627972	0.638733	0.914025	0.911509	0.622963	1.03715	0.919436	0.655073	0.587295	0.814372	1.08834	1.05032	1.12762	0.888612	0.930011	1.09381	0.949177	0.948225	0.908624	0.876964	0.874149
X4 (S110)	1.0702	1.305	0.924882	0.997377	1.05337	1.08518	0.968244	0.96762	1.13971	1.11748	1.13183	0.945009	1.18472	0.905469	1.03057	1.03625	2.05005	0.992809	0.654901	1.15264	0.94424	0.956029	1.00077	1.00533	1.00182	0.98678	0.976725	0.967659	1.06877	1.08041
X5 (S111)	1.3209	1.18875	0.717347	2.04222	1.12133	1.25247	1.27937	1.27845	0.83445	1.05594	1.05008	0.732442	0.999758	1.54835	1.00172	1.11078	0.60771	1.05274	1.6481	1.19565	0.889883	0.852612	1.12395	1.10156	0.92714	1.04615	1.04323	1.08573	1.17692	1.21464
Dimension of the difference of compare swquence and reference sequence
Different harvesting times
Sample	1	2	3	4	5	6	7	8	9	10	11	12	13	14	15	16	17	18	19	20	21	22	23	24	25	26	27	28	29	30
X1 (S26)	0.165241	1.10247	1.06067	0.985908	0.327711	0.941901	0.248654	0.247516	0.990527	0.756558	0.744241	0.695775	1.16036	0.346842	0.0538517	1.73823	0	0.450286	0	0.0283447	2.01923	0.177343	1.43456	0	0.556938	0.753185	0	0.647531	0.397491	0.403683
X2 (S27)	0.497047	1.19285	1.12968	1.04842	0.148231	0.71875	0.370736	0.369467	0.931323	0.746065	0.717661	1.67124	0.890905	0	0.147707	2.02037	2.26717	0.838756	3.3368	1.31472	1.55199	1.05842	1.39029	0.589262	1.21367	0.621099	1.5309	0.780773	0.348261	0.325779
X3 (S28)	0.96978	1.25923	0.988195	1.32144	0.63091	0.830106	0.93447	0.933153	1.03425	0.920252	0.924395	1.54936	1.07182	0.531216	0.1036	2.30663	2.66052	0.607756	3.51556	1.38842	1.59758	1.11108	1.51294	0.951587	1.28067	0.970334	1.80128	1.0731	0.712931	0.545326
X4 (S29)	0	0	0	2.00891	0	0	0	0	0	0	0	0	0	0.354144	0.167197	0	2.5293	0	3.24916	0	0	0	0	0.16293	0	0	0.99142	0	0	0
X5 (S30)	0.65038	0.897199	0.978648	0	0.712809	0.761884	0.744165	0.744354	0.810638	0.887723	0.883048	0.378181	0.758636	0.129609	0	1.89188	2.98685	0.596044	3.39901	1.19709	1.5406	1.07696	1.39103	0.919001	1.34881	0.969479	1.81255	1.05971	0.780031	0.594901
Different habitats
Sample	1	2	3	4	5	6	7	8	9	10	11	12	13	14	15	16	17	18	19	20	21	22	23	24	25	26	27	28	29	30
X1 (S102)	0	0	0	0	0	0	0	0	0	0	0	0	0.742003	0	0.136293	0	1.54193	0	0.251916	0	0	0	0.519763	0.252459	0	0.436051	0.584908	0.409605	1.60418	0
X2 (S103)	0.470877	0.709077	0.518476	1.35752	0.395588	0.781883	0.273902	0.27451	0.93713	0.892113	0.911592	1.75293	1.33544	0.400132	0.110147	0.52761	1.77883	0.820956	0.981401	0.759514	0.941252	0.504493	0.553073	0.321242	0.490901	0.330217	0.440466	0.40678	0	2.30535
X3 (S104)	0.576244	0.492973	0.490424	1.09823	0.319853	0.576404	0.27698	0.277606	0.611785	0.480869	0.507836	0.903138	0	0.512566	0.0901202	0.222706	1.62264	0.151229	0	0.137922	0.737693	0.340293	0	0	0.20263	0	0	0	0.846754	2.35619
X4 (S105)	0.888614	0.588608	0.89379	1.45575	0.430882	0.537816	0.46984	0.470588	0.99267	0.698204	0.745903	2.29518	0.669192	0.292659	0.104028	1.00844	1.16771	1.18553	0.908774	1.42499	1.66435	1.19896	1.09779	0.361589	1.33774	0.532536	0.677175	0.925989	1.462	0.712229
X5 (S106)	0.173014	0.63035	0.755949	0.896755	0.144118	0.580262	0.421625	0.422085	0.817592	0.447683	0.42529	2.03234	1.57576	0.697751	0	0.730498	0	0.484742	0.535992	0.529747	0.911751	0.472446	0.691994	0.366585	0.615155	0.470082	0.615663	0.658757	0.907146	1.59993
Different processing methods
Sample	1	2	3	4	5	6	7	8	9	10	11	12	13	14	15	16	17	18	19	20	21	22	23	24	25	26	27	28	29	30
X1 (S107)	0.474773	0.24	0	1.04109	0.0719568	0.344453	0.166291	0.164874	0	0	0	0.715159	0.214579	0.664614	0.0825066	0.555891	1.24417	0	0.50377	0.43617	0.151675	0.196108	0.0579946	0.0924306	0.222222	0.0467068	0.0356252	0	0.181309	0.238672
X2 (S108)	0.350987	0.30875	0.408301	1.28591	0	0.326194	0.0214569	0.0189199	0.150239	0.100699	0.0945324	0	0.250846	0.508874	0.0612472	0	1.16876	0.898921	0.909788	0.391767	0	0	0.203221	0.147585	0	0.0277074	0.0190001	0.13347	0.295184	0.359809
X2 (S109)	0.528048	0.86	1.57343	1.83925	0.511693	0.424398	0.897972	0.897616	0.733971	0.521678	0.498212	0.647816	0.273211	0.925389	0	0.325277	1.39498	1.04575	0.833723	0.107308	0.0832895	0.00229815	0.235334	0.171548	0.00591985	0.0969759	0.0950006	0.177105	0.299955	0.340492
X2 (S110)	0.250705	0	0.854952	1.04484	0.0829502	0.167292	0.311125	0.310828	0.163636	0.0321678	0.00510986	0.616832	0	0.642883	0.00658028	0.208459	0	0.640232	0.993194	0.0430157	0.189374	0.173893	0.123179	0.0962343	0.0979053	0.059373	0.0665004	0.11807	0.108149	0.134233
X2 (S111)	0	0.11625	1.06249	0	0.014991	0	0	0	0.4689	0.0937063	0.0868677	0.829399	0.184961	0	0.0354323	0.133938	1.44234	0.580304	0	0	0.243731	0.27731	0	0	0.172587	0	0	0	0	0
Correlation coefficient of the evaluation materials and main indicators
Different harvesting times
Sample	1	2	3	4	5	6	7	8	9	10	11	12	13	14	15	16	17	18	19	20	21	22	23	24	25	26	27	28	29	30
X1 (S26)	0.914072	0.614556	0.623669	0.640664	0.842862	0.651107	0.876072	0.876569	0.639587	0.699103	0.702544	0.716422	0.602363	0.8352	0.970275	0.502796	1	0.796072	1	0.984131	0.465389	0.908356	0.550625	1	0.759393	0.700042	1	0.730791	0.815573	0.813236
X2 (S27)	0.779563	0.595732	0.608764	0.626392	0.92223	0.709776	0.825824	0.826317	0.653668	0.702032	0.710088	0.512619	0.663643	1	0.922483	0.465249	0.436721	0.676971	0.34503	0.572101	0.531088	0.624169	0.558368	0.748934	0.591556	0.738911	0.534495	0.692434	0.834637	0.843643
X3 (S28)	0.644452	0.582624	0.64013	0.570853	0.735876	0.679234	0.652904	0.653224	0.629571	0.65637	0.655357	0.531511	0.621212	0.767926	0.944342	0.432481	0.397841	0.743079	0.333333	0.5587	0.523873	0.61271	0.53743	0.648779	0.578512	0.644321	0.493889	0.620932	0.711447	0.763222
X4 (S29)	1	1	1	0.466665	1	1	1	1	1	1	1	1	1	0.832312	0.913144	1	0.410018	1	0.351069	1	1	1	1	0.915172	1	1	0.639379	1	1	1
X5 (S30)	0.729927	0.66207	0.642363	1	0.711482	0.697625	0.702566	0.702513	0.684382	0.664441	0.665617	0.822946	0.698525	0.931329	1	0.481629	0.370478	0.746777	0.340867	0.594876	0.532923	0.620086	0.558237	0.656677	0.565824	0.644523	0.49233	0.623882	0.692637	0.747139
Different habitats
Sample	1	2	3	4	5	6	7	8	9	10	11	12	13	14	15	16	17	18	19	20	21	22	23	24	25	26	27	28	29	30
X1 (S102)	1	1	1	1	1	1	1	1	1	1	1	1	0.613559	1	0.896307	1	0.433119	1	0.823836	1	1	1	0.693871	0.823523	1	0.729856	0.668232	0.742014	0.423429	1
X2 (S103)	0.714442	0.624264	0.694398	0.464618	0.748622	0.601075	0.811361	0.811022	0.556959	0.56907	0.563766	0.401939	0.468701	0.746467	0.914498	0.690679	0.398419	0.589327	0.545541	0.608015	0.555876	0.700168	0.68052	0.785744	0.70587	0.781068	0.727866	0.743336	1	0.338198
X3 (S104)	0.671532	0.704995	0.706072	0.517542	0.786472	0.671471	0.809645	0.809297	0.658198	0.710139	0.69878	0.566056	1	0.696825	0.928939	0.841015	0.420637	0.886236	1	0.895197	0.61494	0.775885	1	1	0.853243	1	1	1	0.581818	0.333333
X4 (S105)	0.570034	0.666832	0.56861	0.44729	0.732201	0.686571	0.714891	0.714567	0.542709	0.627882	0.612316	0.339188	0.637743	0.801014	0.918863	0.538795	0.502212	0.498428	0.564527	0.452576	0.414464	0.495612	0.517642	0.765153	0.468271	0.68869	0.634999	0.559908	0.446231	0.623224
X5 (S106)	0.871946	0.651441	0.609135	0.567797	0.891003	0.669997	0.736438	0.736226	0.59032	0.724634	0.734755	0.366958	0.427799	0.628034	1	0.617258	1	0.708485	0.687302	0.689815	0.563723	0.713763	0.629967	0.762679	0.65696	0.714786	0.656774	0.641366	0.564968	0.424076
Different processing methods
Sample	1	2	3	4	5	6	7	8	9	10	11	12	13	14	15	16	17	18	19	20	21	22	23	24	25	26	27	28	29	30
X1 (S107)	0.659514	0.793036	1	0.469024	0.927432	0.727506	0.846865	0.847972	1	1	1	0.562536	0.81081	0.580483	0.917669	0.623256	0.425005	1	0.646078	0.678291	0.85842	0.824233	0.940678	0.90867	0.805383	0.951666	0.962706	1	0.835313	0.793945
X2 (S108)	0.723765	0.748651	0.692527	0.416962	1	0.738168	0.9772	0.979841	0.859571	0.901306	0.906787	1	0.785687	0.64377	0.937558	1	0.440351	0.505692	0.502688	0.701258	1	1	0.819012	0.86171	1	0.970752	0.979757	0.873259	0.757011	0.718774
X3 (S109)	0.635243	0.516752	0.368875	0.333333	0.642502	0.684233	0.505956	0.506055	0.556136	0.63805	0.648611	0.586704	0.770956	0.498437	1	0.738712	0.397314	0.467914	0.524496	0.895506	0.916952	0.997507	0.79624	0.842785	0.993604	0.904607	0.906369	0.838515	0.75405	0.729793
X4 (S110)	0.785782	1	0.518222	0.468129	0.917263	0.846086	0.747206	0.747387	0.848941	0.966203	0.994474	0.598535	1	0.588556	0.992895	0.815209	1	0.589557	0.480769	0.955315	0.829238	0.840978	0.881877	0.905268	0.903781	0.939353	0.932564	0.886219	0.894773	0.872627
X5 (S111)	1	0.887776	0.463962	1	0.98396	1	1	1	0.662303	0.907526	0.913693	0.525793	0.832551	1	0.9629	0.872871	0.389347	0.613112	1	1	0.790493	0.768316	1	1	0.841984	1	1	1	1	1
Correlative degree and weight value of the evalution materials
Different harvesting times
	1	2	3	4	5	6	7	8	9	10	11	12	13	14	15	16	17	18	19	20	21	22	23	24	25	26	27	28	29	30
ri	0.813603	0.690996	0.702985	0.660915	0.84249	0.747548	0.811473	0.811724	0.721442	0.744389	0.746721	0.716699	0.717149	0.873354	0.950049	0.576431	0.523012	0.79258	0.47406	0.741962	0.610655	0.753064	0.640932	0.793913	0.699057	0.745559	0.632019	0.733608	0.810859	0.833448	21.9127
ωК	0.0371293	0.0315341	0.0320812	0.0301613	0.0384476	0.0341149	0.0370321	0.0370436	0.0329235	0.0339707	0.0340771	0.032707	0.0327275	0.0398561	0.0433561	0.0263058	0.023868	0.0361699	0.021634	0.0338599	0.0278676	0.0343666	0.0292493	0.0362307	0.0319019	0.0340241	0.0288426	0.0334787	0.0370041	0.0380349
Different habitats
	1	2	3	4	5	6	7	8	9	10	11	12	13	14	15	16	17	18	19	20	21	22	23	24	25	26	27	28	29	30
ri	0.765591	0.729506	0.715643	0.59945	0.83166	0.725823	0.814467	0.814223	0.669637	0.726345	0.721923	0.534828	0.62956	0.774468	0.931721	0.737549	0.550878	0.736495	0.724241	0.72912	0.629801	0.737085	0.7044	0.82742	0.736869	0.78288	0.737574	0.737325	0.603289	0.543766	21.5035
ωК	0.035603	0.0339249	0.0332802	0.0278768	0.0386755	0.0337536	0.037876	0.0378646	0.0311408	0.0337779	0.0335723	0.0248716	0.0292771	0.0360158	0.0433288	0.034299	0.025618	0.0342499	0.0336801	0.033907	0.0292882	0.0342774	0.0327574	0.0384783	0.0342673	0.036407	0.0343001	0.0342885	0.0280553	0.0252873
Different processing methods
	1	2	3	4	5	6	7	8	9	10	11	12	13	14	15	16	17	18	19	20	21	22	23	24	25	26	27	28	29	30
ri	0.760861	0.789243	0.608717	0.53749	0.894231	0.799199	0.815445	0.816251	0.78539	0.882617	0.892713	0.654714	0.840001	0.662249	0.962205	0.81001	0.530403	0.635255	0.630806	0.846074	0.879021	0.886207	0.887561	0.903687	0.90895	0.953276	0.956279	0.919599	0.848229	0.823028	24.1197
ωК	0.0315452	0.0327219	0.0252373	0.0222842	0.0370747	0.0331347	0.0338083	0.0338417	0.0325622	0.0365932	0.0370118	0.0271443	0.0348263	0.0274568	0.0398929	0.0335829	0.0219905	0.0263376	0.0261531	0.0350781	0.0364441	0.036742	0.0367982	0.0374667	0.037685	0.0395227	0.0396472	0.0381264	0.0351675	0.0341226
